# Supplementary material
Source: publisher figshare collection journal article supplement (https://diabetesjournals.figshare.com/ndownloader/files/22669490)
Supplement: Supplementary file 1 [file 22669490]

**Supplemental Table 1. Participant characteristics at the time of biomarker assessment by sex***

|  | **Total cohort (n=572)** | **Men (n=279)** | **Women (n=293)** | **p-value** |
| --- | --- | --- | --- | --- |
| Age (years) | 28.4 (22.6, 34.8) | 27.9 (22.5, 35.0) | 28.6 (22.6, 34.5) | 0.99 |
| Age at diabetes onset (years) | 8.6 (5.2, 11.7) | 8.5 (5.0, 11.7) | 8.7 (5.7, 11.7) | 0.26 |
| Diabetes duration (years) | 19.1 (14.3, 26.2) | 19.5 (14.4, 26.3) | 18.7 (13.9, 25.8) | 0.48 |
| Females (%, n) | 51.1 (293) | -- | -- |  |
| Body mass index (kg/m2) | 23.8 (3.3) | 24.0 (3.1) | 23.7 (3.5) | 0.27 |
| Waist to hip ratio | 0.83 (0.76, 0.87) | 0.87 (0.84, 0.90) | 0.76 (0.74 0.81) | <0.0001 |
| Ever smoker (%, n) | 36.4 (207) | 39.7 (110) | 33.1 (96) | 0.10 |
| Insulin dose per body weight | 0.74 (0.59, 0.93) | 0.78 (0.64, 0.95) | 0.71 (0.56, 0.91) | 0.007 |
| HbA1c (%) | 8.7 (7.9, 9.8) | 8.8 (7.9, 9.9) | 8.6 (7.8, 9.8) | 0.17 |
| Systolic blood pressure (mmHg) | 111 (104, 120) | 113 (107, 124) | 108 (101, 117) | <0.0001 |
| Diastolic blood pressure (mmHg) | 71 (65, 79) | 75 (68, 81) | 69 (62, 75) | <0.0001 |
| Hypertension medications (%; n) | 11.3 (62) | 14.8 (39) | 7.8 (22) | 0.009 |
| Pulse rate (beats/min) | 76 (68, 82) | 76 (68, 80) | 78 (71, 84) | 0.02 |
| Hypertension (%, n) | 16.4 (94) | 21.5 (60) | 11.3 (33) | 0.0009 |
| HDL cholesterol (mg/dL) | 51.5 (44.6, 61.0) | 47.2 (41.4, 54.6) | 57.2 (49.2, 67.3) | <0.0001 |
| Non-HDL cholesterol (mg/dL) | 112.5 (89.7, 130.0) | 132.0 (110.3, 162.9) | 127.3 (105.5, 152.0) | 0.06 |
| Lipid medications (%; n) | 0.91 (5) | 1.1 (3) | 0.70 (2) | 0.68 |
| Triglycerides (mg/dL) | 83.0 (61.0, 123.0) | 92.0 (64.0, 129.0) | 77.0 (59.0, 110.5) | 0.0004 |
| ACE / ARB (%; n) | 5.3 (29) | 6.4 (17) | 4.2 (12) | 0.25 |
| White blood cell count (x103/mm2) | 6.3 (5.4, 7.8) | 6.1 (5.2, 7.8) | 6.5 (5.6, 7.8) | 0.08 |
| AER (μg/min) | 13.9 (7.1, 108.1) | 16.6 (7.9, 131.2) | 13.0 (6.5, 103.9) | 0.07 |
| eGFR (mL/min/1.73 m2) | 107.8 (86.1, 124.6) | 109.1 (87.0, 124.3) | 105.2 (85.1, 125.0) | 0.53 |
| hs-cTnT (ng/L) | 5.0 (<3.0, 10.0) | 7.9 (5.0, 13.0) | 3.4 (<3.0, 6.0) | <0.0001 |
| NT-proBNP (ng/L) | 22.0 (7.0, 59.0) | 11.0 (4.0, 29.0) | 36.0 (16.0, 81.0) | <0.0001 |

ACE/ARB, angiotensin converting enzyme inhibitor / angiotensin receptor blocker; AER, albumin excretion rate; eGFR, estimated glomerular filtration rate; HDL, high-density lipoprotein; hs-cTnT, High-sensitivity cardiac Troponin-T; NT-proBNP, N-terminal pro B-Type natriuretic peptide.

* Data are mean (SD), median (interquartile range) or percent (n). The sample size with data available was 572 for body mass index; 493 for waist to hip ratio; 568 for having ever smoked; 539 for insulin dose / weight; 548 for hypertension medications; 552 for lipid medications; 551 for ACE/ARB; 541 for triglycerides; 567 for white blood cell count; and 570 for AER.

**Supplemental Table S2. Spearman correlations between high-sensitivity cardiac Troponin (hs-cTnT) and pro Brain Natriuretic Peptide N-Terminal (NT-proBNP) and participant characteristics**

| **Variable** |  | **hs-cTnT** |  |  | **NT-proBNP** |  |
| --- | --- | --- | --- | --- | --- | --- |
|  | **n** | **r** | **p-value** | **n** | **r** | **p-value** |
| hs-cTnT | -- | -- | -- | 573 | 0.07 | 0.10 |
| Age | 573 | 0.20 | <0.0001 | 574 | 0.29 | <0.0001 |
| Duration | 573 | 0.23 | <0.0001 | 574 | 0.22 | <0.0001 |
| BMI | 572 | 0.06 | 0.13 | 573 | -0.15 | 0.0002 |
| Men | 279 | 0.04 | 0.51 | 280 | -0.13 | 0.03 |
| Women | 293 | 0.008 | 0.09 | 293 | -0.15 | 0.009 |
| WHR | 493 | 0.39 | <0.0001 | 494 | -0.26 | <0.0001 |
| Men | 239 | 0.13 | 0.05 | 240 | 0.09 | 0.15 |
| Women | 254 | 0.09 | 0.13 | 254 | -0.06 | 0.35 |
| Insulin / weight | 539 | -0.11 | 0.01 | 540 | -0.23 | <0.0001 |
| HbA1c | 573 | 0.11 | 0.010 | 574 | 0.00 | 1.00 |
| SBP | 573 | 0.35 | <0.0001 | 574 | 0.17 | <0.0001 |
| DBP | 573 | 0.36 | <0.0001 | 574 | 0.04 | 0.30 |
| Pulse | 573 | -0.003 | 0.94 | 574 | 0.07 | 0.09 |
| HDLc | 573 | -0.24 | <0.0001 | 574 | 0.13 | 0.002 |
| Men | 279 | -0.03 | 0.61 | 280 | -0.02 | 0.78 |
| Women | 294 | -0.10 | 0.08 | 294 | -0.01 | 0.83 |
| Non-HDLc | 573 | 0.26 | <0.0001 | 574 | 0.10 | 0.01 |
| Triglycerides | 541 | 0.27 | <0.0001 | 542 | 0.10 | 0.02 |
| WBC count | 567 | 0.09 | 0.03 | 568 | 0.12 | 0.004 |
| AER | 570 | 0.44 | <0.0001 | 571 | 0.21 | <0.0001 |
| eGFR | 573 | -0.29 | <0.0001 | 574 | -0.27 | <0.0001 |

AER, albumin excretion rate; BMI, body mass index; DBP, diastolic blood pressure; eGFR, estimated glomerular filtration rate; HDLc, high-density lipoprotein cholesterol; hs-cTnT, High-sensitivity cardiac Troponin-T; NT-proBNP, N-terminal pro B-Type natriuretic peptide; SBP, systolic blood pressure; WBC, white blood cell; WHR, waist to hip ratio.
